# Supplementary material for: Effects of Oxygen on Lattice Defects in Single-Crystalline Mg2Si Thermoelectrics
Source: Nanomaterials (Basel). 2023 Mar 30;13(7):1222. doi: 10.3390/nano13071222 (PMC10097258; doi:10.3390/nano13071222)
Supplement: Supplementary file 1 [file nanomaterials-13-01222-s001.zip › nanomaterials-2221850-supplementary.pdf]

# Effects of oxygen on lattice defects in single-crystalline $\text{Mg}_2\text{Si}$ thermoelectrics

Kei Hayashi <sup>1,\*</sup>, Sota Kawamura <sup>2</sup>, Yusuke Hashimoto <sup>2</sup>, Noboru Akao <sup>3</sup>, Zhicheng Huang <sup>1</sup>, Wataru Saito <sup>1</sup>, Kaichi Tasaki <sup>1</sup>, Koichi, Hayashi <sup>4,5</sup>, Tomohiro Matsushita <sup>2</sup>, and Yuzuru Miyazaki <sup>1</sup>

<sup>1</sup> Department of Applied Physics, Graduate School of Engineering, Tohoku University, Sendai 980-8579, Japan

<sup>2</sup> Graduate School of Science and Technology, Nara Institute of Science and Technology, Ikoma 630-0192, Japan

<sup>3</sup> Department of Materials Science, Graduate School of Engineering, Tohoku University, Sendai 980-8579, Japan

<sup>4</sup> Department of Physical Science and Engineering, Nagoya Institute of Technology, Nagoya 466-8555, Japan

<sup>5</sup> Japan Synchrotron Radiation Research Institute (JASRI), Sayo 679-5198, Japan

\* Correspondence: kei.hayashi.b5@tohoku.ac.jp; Tel.: +81-22-795-4637

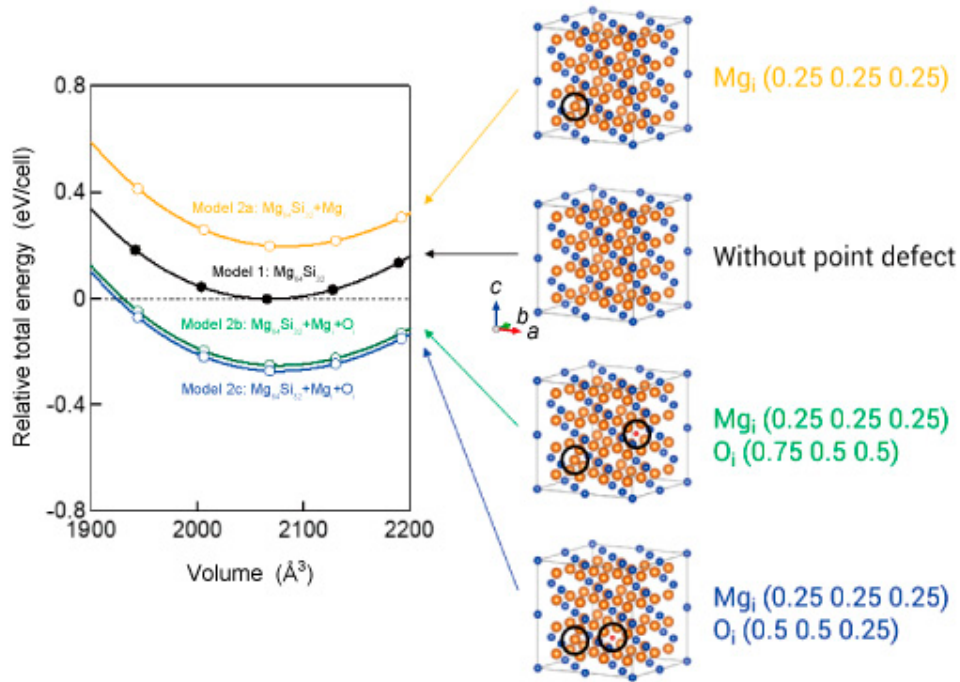

**Figure S1.** Volume dependence of the total energy for the four crystal structure models relative to the minimum energy of Model 1. Crystal structures are drawn by using VESTA [1].

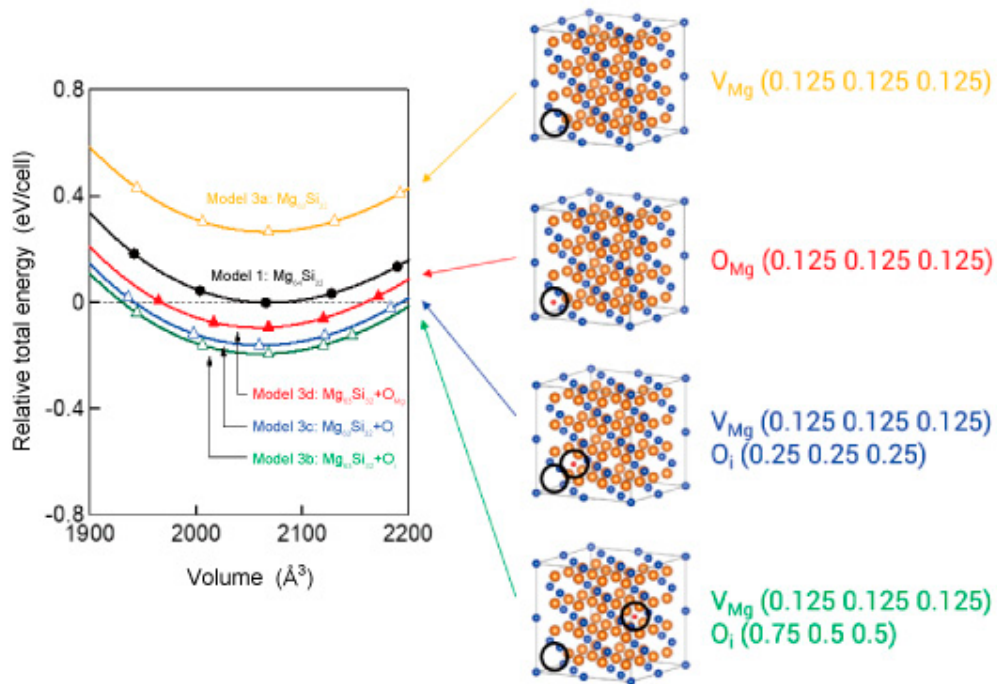

**Figure S2.** Volume dependence of the total energy for the five crystal structure models relative to the minimum energy of Model 1.

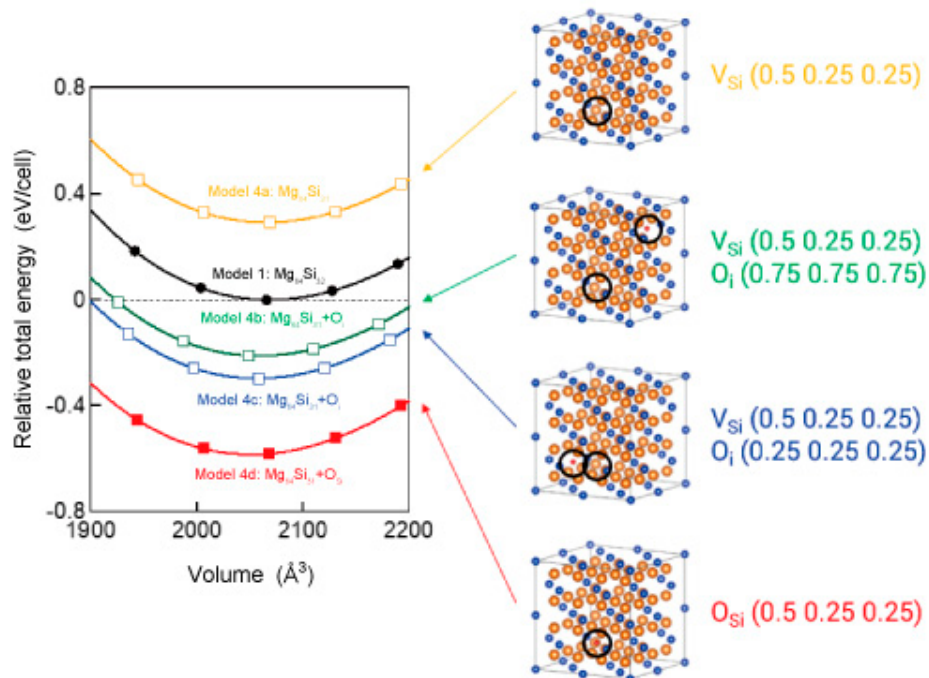

**Figure S3.** Volume dependence of the total energy for the five crystal structure models relative to the minimum energy of Model 1.

**Table S1.** Formation energy of  $\text{Mg}_i$ ,  $V_{\text{Mg}}$ ,  $V_{\text{Si}}$ , and their complex defects in combination with O.

| Model | Defect                     | Formation energy<br>(eV/cell) |
|-------|----------------------------|-------------------------------|
| 2a    | $\text{Mg}_i$              | +0.197                        |
| 2b    | $\text{Mg}_i+\text{O}_i$   | -0.251                        |
| 2c    | $\text{Mg}_i+\text{O}_i$   | -0.272                        |
| 3a    | $V_{\text{Mg}}$            | +0.266                        |
| 3b    | $V_{\text{Mg}}+\text{O}_i$ | -0.193                        |
| 3c    | $V_{\text{Mg}}+\text{O}_i$ | -0.161                        |
| 3d    | $\text{O}_{\text{Mg}}$     | -0.094                        |
| 4a    | $V_{\text{Si}}$            | +0.293                        |
| 4b    | $V_{\text{Si}}+\text{O}_i$ | -0.211                        |
| 4c    | $V_{\text{Si}}+\text{O}_i$ | -0.296                        |
| 4d    | $\text{O}_{\text{Si}}$     | -0.583                        |

## References

1. Momma, K.; Izumi, F. VESTA 3 for three-dimensional visualization of crystal, volumetric and morphology data. *J. Appl. Crystallogr.* **2011**, *44*, 1272-1276.
